# Supplementary material for: Screening and verification of linearly dependent biomarkers with acute toxicity induced by Aconiti Radix based on liquid chromatography-mass spectrometry-based metabolite profiling
Source: Royal Society of Chemistry journal article supplement (doi:10.1039/c5ra21136k), 2015-01-01
Supplement: c5ra21136k1.pdf [file c5ra21136k1.pdf]

1  
2  
3  
4  
5  
6  
7  
8  
9  
10  
11  
12  
13  
14  
15  
16  
17  
18  
19  
20  
21  
22  
23  
24  
25

## Supplementary Information

### Screening and verification of linearly dependent biomarkers with acute toxicity induced by Radix Aconiti based on liquid chromatography–mass spectrometry-based metabolite profiling†

Yubo Li<sup>a</sup>, Zhiguo Hou<sup>a</sup>, Yuming Wang<sup>a</sup>, Lei Wang<sup>a</sup>, Liang Ju<sup>a</sup>, Zhenzhu Zhang<sup>a</sup>, Haoyue Deng<sup>a</sup>, Lei Yuan<sup>a</sup>, Bin Yang<sup>a</sup>, Yanjun Zhang<sup>\*b</sup>

<sup>a</sup> Tianjin State Key Laboratory of Modern Chinese Medicine, School of Traditional Chinese Materia Medica, Tianjin University of Traditional Chinese Medicine, 312 Anshan west Road, Tianjin 300193, China. Fax: +86-22-59596221.; Tel: +86-22-59596221.; E-mail: yuboli1@163.com

<sup>b</sup> Tianjin State Key Laboratory of Modern Chinese Medicine, Tianjin University of Traditional Chinese Medicine, 312 Anshan west Road, Tianjin 300193, China. E-mail: tianjin\_tcm001@sina.com

26 Part 1. Examples of substances identification

27 With the (tR=8.0129 min, m/z 570.355) as an example to explain the process of  
28 identification of compounds. In the HMDB database, we using m/z to search to get  
29 molecular formula of compounds may be C<sub>30</sub>H<sub>52</sub>NO<sub>7</sub>P, in addition, the mass spectra  
30 fragments of compounds, 552.3, 184.1 and 125.0 m/z, corresponding to the loss of -  
31 H<sub>2</sub>O, -C<sub>21</sub>H<sub>41</sub>NO<sub>3</sub>P, -C<sub>28</sub>H<sub>47</sub>NO<sub>3</sub>. According to the fragment information, eventually  
32 concluded that the compound was LPC (22:5).

33

34

35

36

37

38

39

40

41

42

43

44

45

46

47

48 **Table S1** The results of experimental methodology.

| <b>Experiment name</b> | <b>RSD (Retention time)</b> | <b>RSD (Peak area)</b> |
|------------------------|-----------------------------|------------------------|
| Precision instrument   | <0.25%                      | <7.26%                 |
| Method repeatability   | <0.98%                      | <12.44%                |
| Sample stability       | <0.95%                      | <13.68%                |

49

50

51

52

53

54

55

56

57

58

59

60

61

62

63

64

65

66

67 **Table S2**  $R^2$  and  $Q^2$  values of PLS-DA model in ethanol extraction

|           | A     | B     | C     |
|-----------|-------|-------|-------|
| R2X (cum) | 0.293 | 0.34  | 0.245 |
| R2Y (cum) | 0.999 | 0.986 | 0.999 |
| Q2 (cum)  | 0.555 | 0.968 | 0.822 |

68

69

70

71

72

73

74

75

76

77

78

79

80

81

82

83

84

85

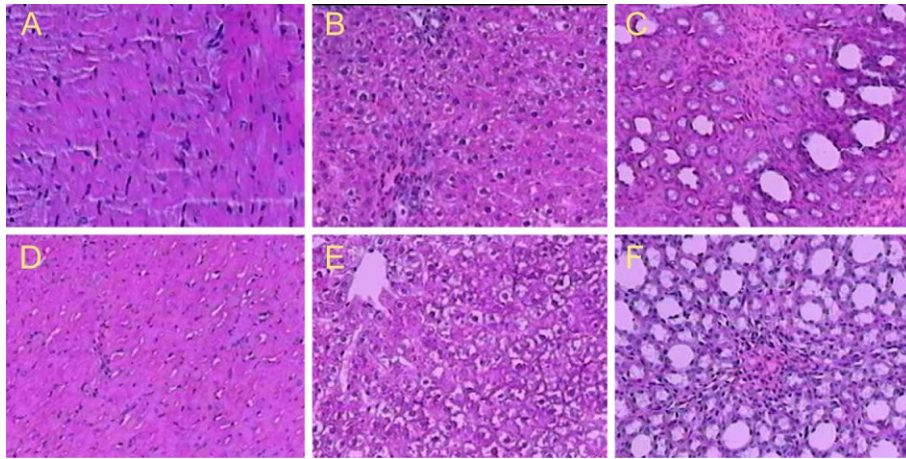

86

87 **Fig S1** pathological examination of heart, kidney and liver tissue following the  
 88 administration of Radix Aconitit ethanol extraction at a dose of 10 g kg A:Healthy  
 89 heart control; B: healthy liver control; C: healthy renal control; D: histopathological  
 90 changes in the heart tissue: dilated blood vessels under subcapsular E:  
 91 histopathological changes in the liver tissue:partial swelling of liver cells F:  
 92 histopathological changes in the kidney tissue: slight edema on proximal tubule. All  
 93 photomicrographs showed no obvious fibrosis and inflammation magnification\*200.

94

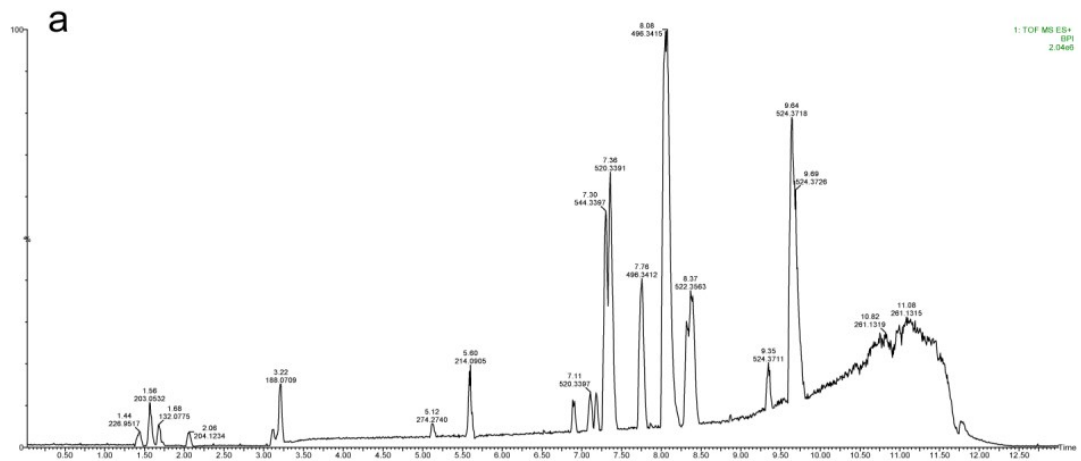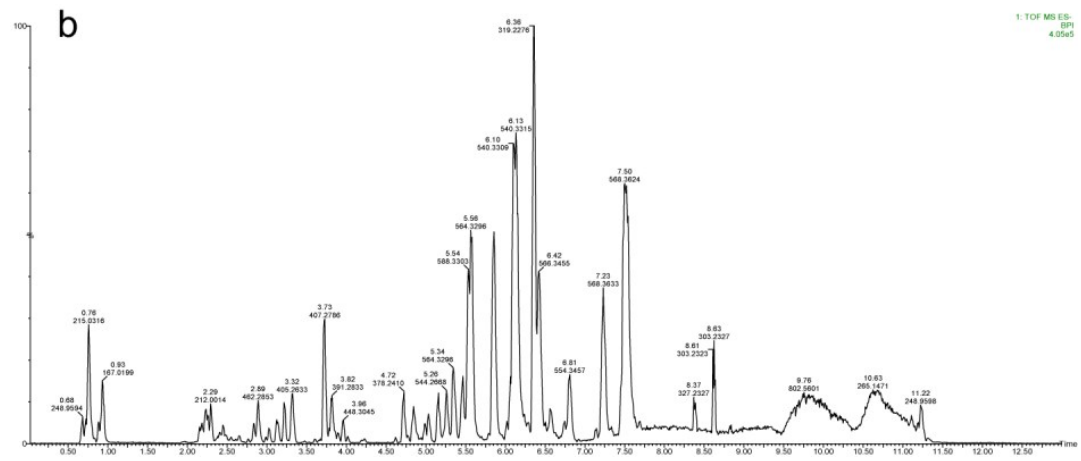

96 **Figure S2.** Basic peak ion (BPI) chromatograms of QC samples in (a) ESI<sup>+</sup> mode and  
 97 (b) ESI<sup>-</sup> mode

98

99

100

101

102

103

104

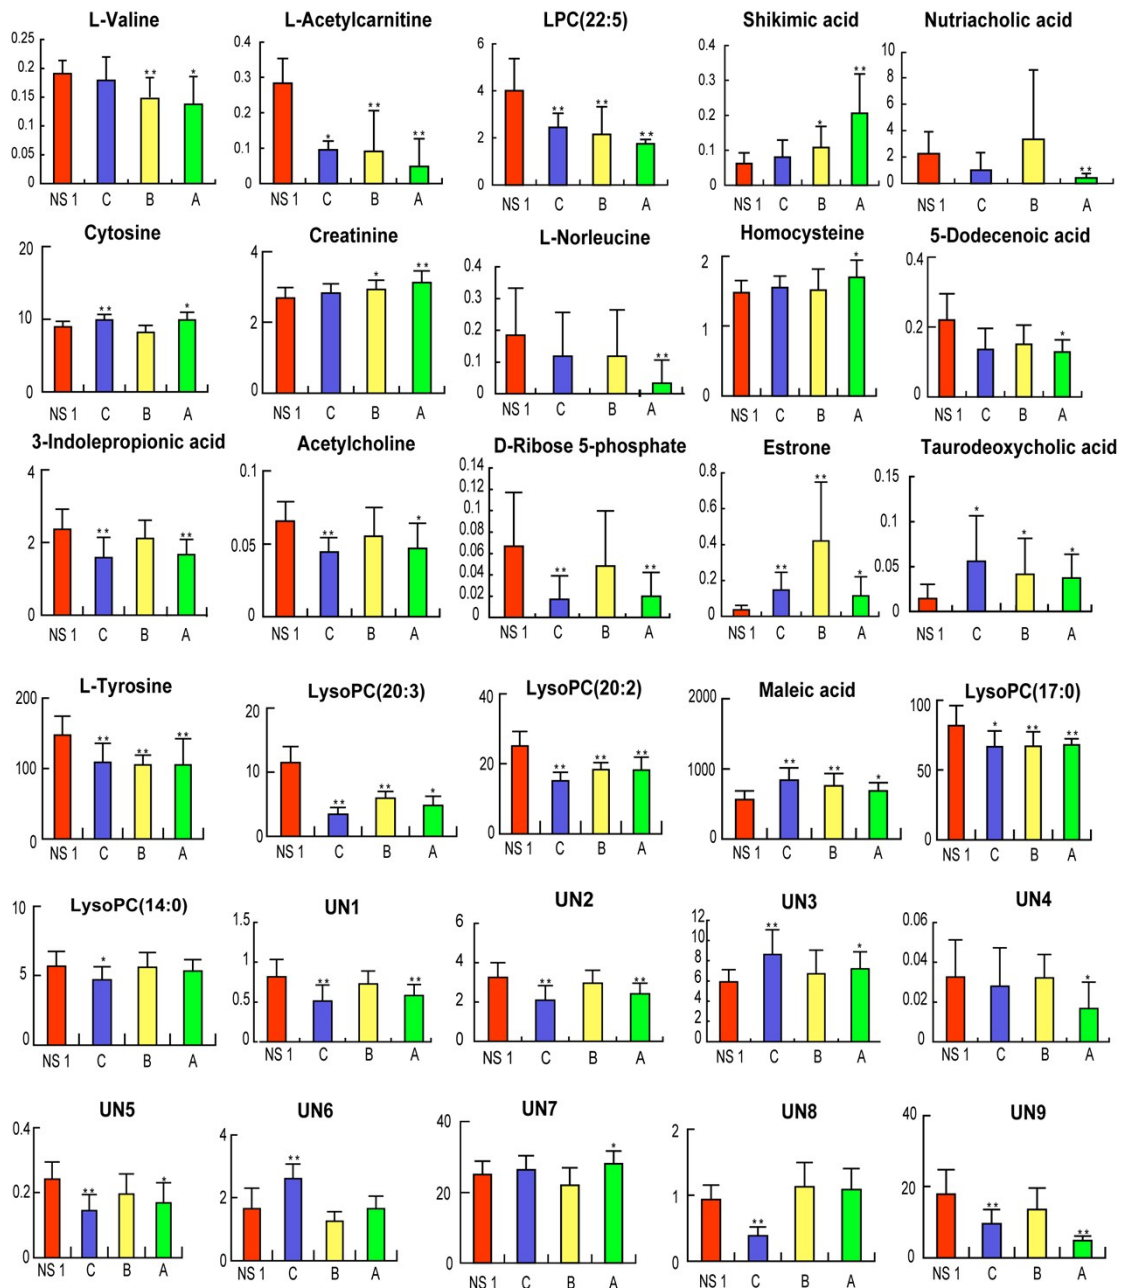

105

106 **Figure S3** The trends in all potential biomarkers' relative content (peak area  
 107 intensity) changed with different concentrations of administration (ethanol extract  
 108 group). NS: Normal Saline; 2 g/kg ethanol extraction B: 5 g/kg ethanol extraction A:  
 109 10 g/kg ethanol extraction; significant difference from control: \* $p < 0.05$ , \*\* $p < 0.01$ .

110

111

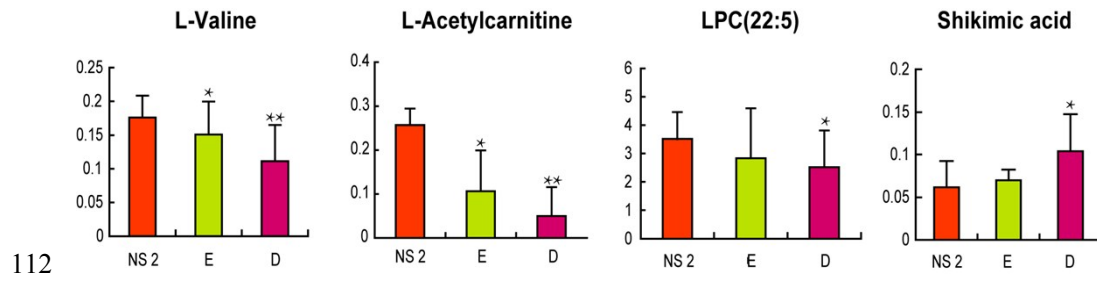

112  
 113 **Figure S4** The peak area intensity variation of four substances in water extraction are  
 114 as same as in ethanol extraction NS 2:Normal Saline, D:10g/kg, E:5g/kg statistical  
 115 difference from control: \*p<0.05, \*\*p<0.01.

116

117

118

119

120

121

122

123

124

125

126



127

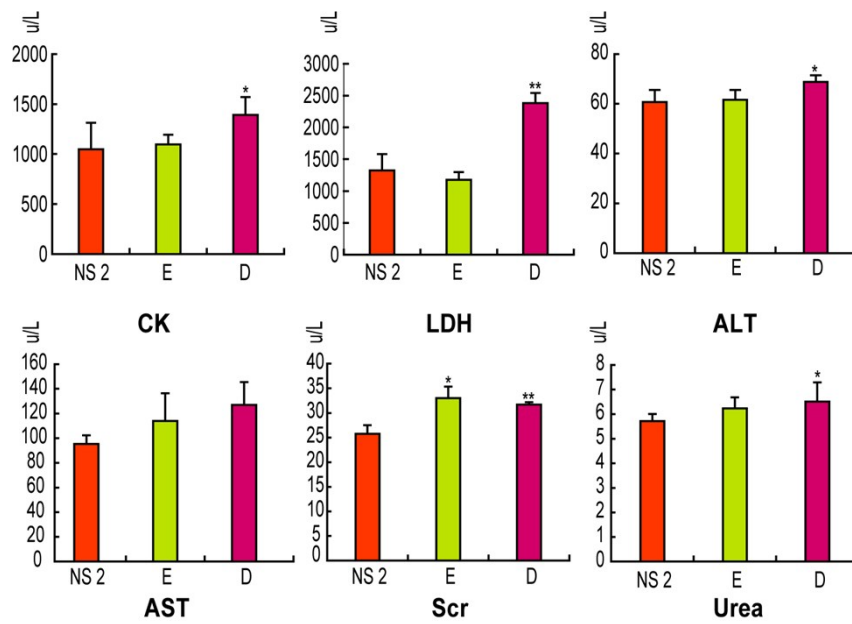

128

129 **Figure S5** Various biochemical parameters in rats of administrating with *Radix*  
130 *Aconitit* water extraction. NS 2:Normal Saline, D:10g/kg, E:5g/kg statistical  
131 difference from control: \*p<0.05, \*\*p<0.01.

132

133

134

135

136

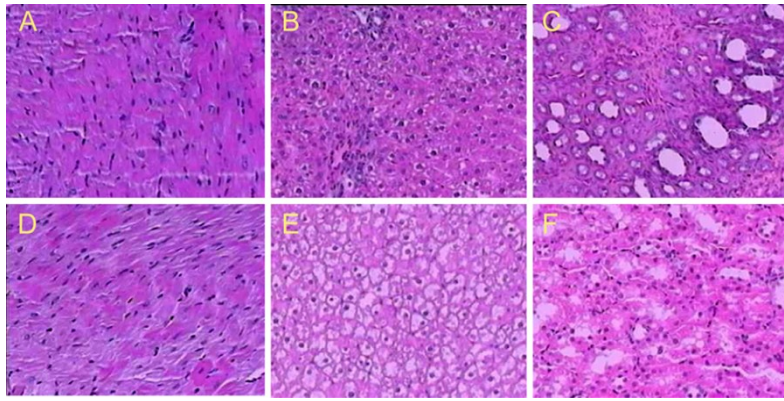

137

138 **Fig S6** pathological examination of heart, kidney and liver tissue following the  
139 administration of *Radix Aconitit* water extraction at a dose of 10 g kg A:Healthy  
140 heart control; B: healthy liver control; C: healthy renal control; D: histopathological  
141 changes in the heart tissue: slightly irregular nuclear E: histopathological changes in  
142 the liver tissue:partial swelling of liver cells F: histopathological changes in the  
143 kidney tissue: partial distal convoluted tubule and collecting duct dilatation with  
144 epithelial atrophy. All photomicrographs showed no obvious fibrosis and  
145 inflammation magnification\*200.

146

147

148

149

150

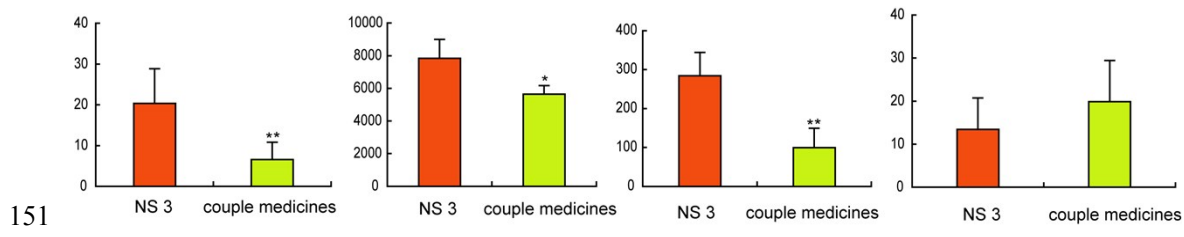

151

152 **Figure S7** The peak area intensity variation of four substances in water extraction are  
 153 as same as in ethanol extraction NS 3:Normal Saline, couple medicines: processed  
 154 *Radix Aconiti-Pinellia ternata* couple medicines. statistical difference from control:  
 155 \* $p < 0.05$ , \*\* $p < 0.01$ .

156

157

158

159

160

161

162

163

164

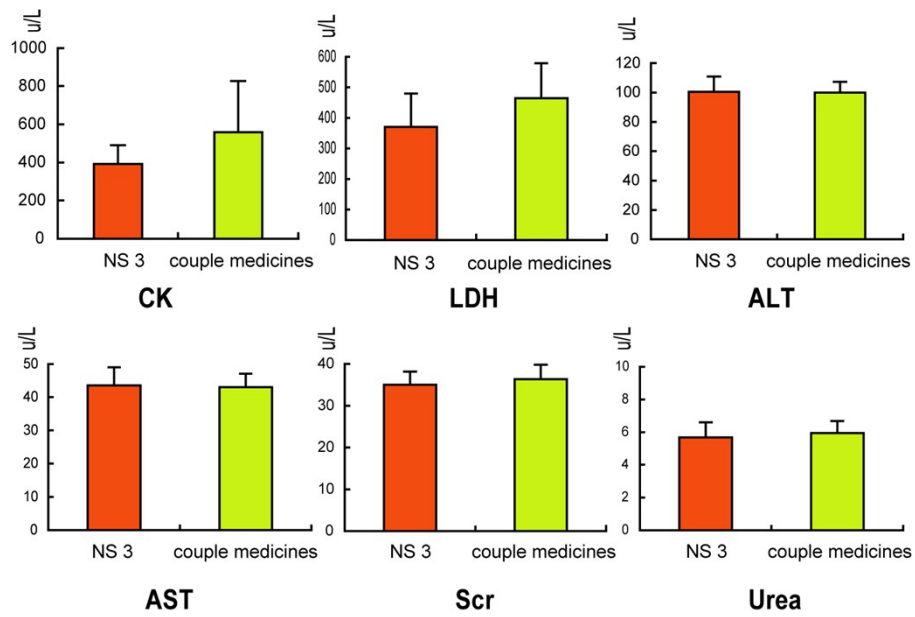

165

166 **Figure S8** Various biochemical parameters in rats of administrating with processed  
 167 *Radix Aconiti-Pinellia ternata* couple medicines. NS 3:Normal Saline, couple  
 168 medicines: processed *Radix Aconiti-Pinellia ternata* couple medicines. No statistical  
 169 difference was shown from control

170

171

172

173

174

175

176

177

178

179

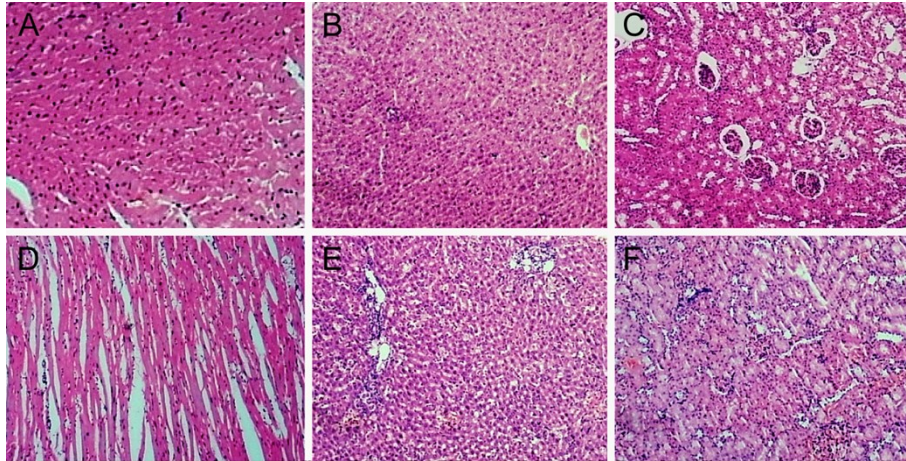

180

181 **Fig S9** Pathological examination of heart, kidney and liver tissue following the  
182 administration of processed *Radix Aconiti-Pinellia ternata* couple medicines at a dose  
183 of 10 g/kg A:Healthy heart control; B: healthy liver control; C: healthy renal control;  
184 D: histopathological changes in the heart tissue: slightly irregular nuclear, peripheral  
185 lymphocytes and plasma cells increased E: histopathological changes in the liver  
186 tissue:partial swelling of liver cells, mitosis and apoptosis increased F:  
187 histopathological changes in the kidney tissue: partial distal convoluted tubule and  
188 collecting duct dilatation with epithelial atrophy. All photomicrographs showed no  
189 obvious fibrosis and inflammation magnification\*200.
